# Supplementary material
Source: PubMed Central journal article supplement (PMC6916121)
Supplement: Supp_Fig1.pdf [file Supp_Fig1.pdf]

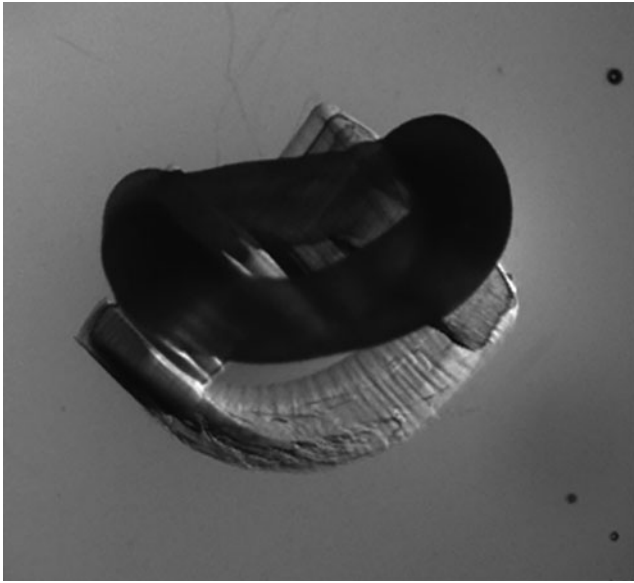

**SUPPLEMENTARY FIG. S1.** Image of differentiated skeletal muscle that was frozen after transfer to the PEGDA skeleton. The effects of freezing on the PEGDA skeleton caused deflection of the beam such that the pillars came into contact and no active tension could be measured. PEGDA, polyethylene glycol diacrylate.
