# Supplementary material
Source: PubMed Central journal article supplement (PMC6916121)
Supplement: Supp_Fig2.pdf [file Supp_Fig2.pdf]

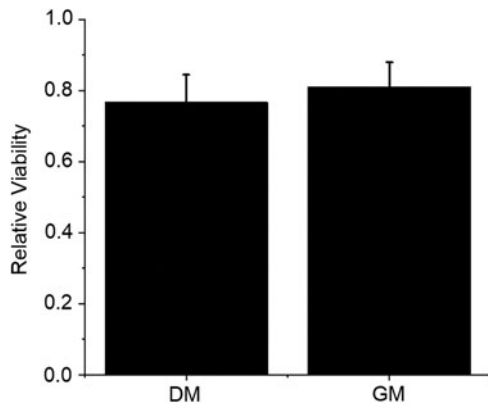

**SUPPLEMENTARY FIG. S2.** Viability of differentiated muscle rings frozen in differentiation media and growth media ( $n=3$ ).
