# Supplementary material
Source: PubMed Central journal article supplement (PMC6916121)
Supplement: Supp_Fig3.pdf [file Supp_Fig3.pdf]

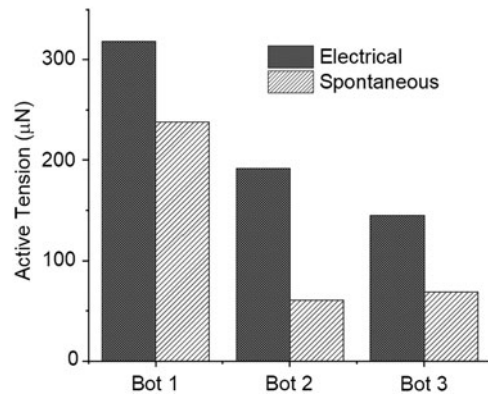

**SUPPLEMENTARY FIG. S3.** Electrical and spontaneous active tension measurements of three frozen undifferentiated muscle rings.
