# Supplementary material
Source: PubMed Central journal article supplement (PMC6916121)
Supplement: Supp_Fig4.pdf [file Supp_Fig4.pdf]

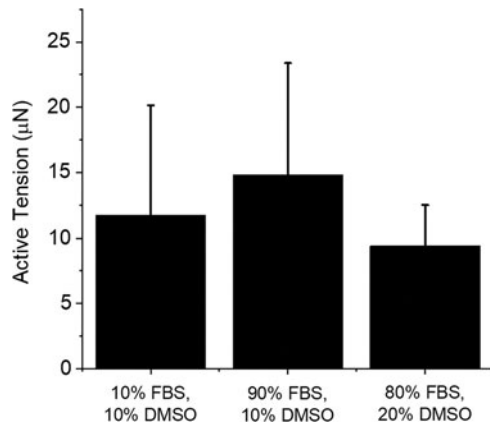

**SUPPLEMENTARY FIG. S4.** Freezing media for differentiated muscle were modified to increase FBS and DMSO concentration ( $n=3$ ). FBS, fetal bovine serum; DMSO, dimethyl sulfoxide.
