# Supplementary material
Source: PubMed Central journal article supplement (PMC6916121)
Supplement: Supp_Fig5.pdf [file Supp_Fig5.pdf]

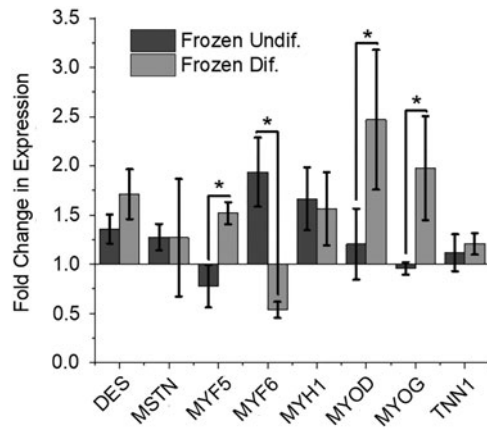

**SUPPLEMENTARY FIG. S5.** Comparison of gene expression in frozen undifferentiated and frozen differentiated muscle, each normalized to unfrozen controls ( $n = 3$ ). (\* $p < 0.05$ , \*\* $p < 0.01$ ).
