# Supplementary material
Source: PubMed Central journal article supplement (PMC6916121)
Supplement: Supp_Fig6.pdf [file Supp_Fig6.pdf]

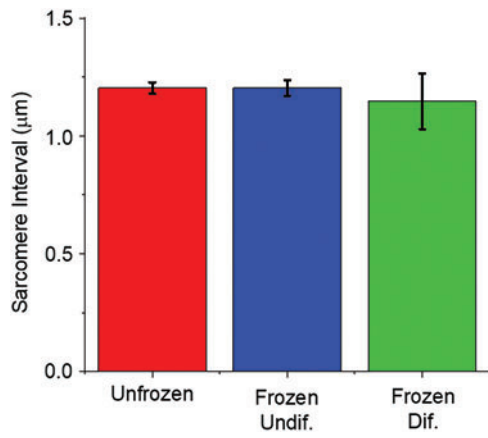

**SUPPLEMENTARY FIG. S6.** Sarcomere interval measured by calculating the distance between  $\alpha$ -actinin bands in lightsheet images.
