# Supplementary material
Source: PubMed Central journal article supplement (PMC6916121)
Supplement: Supp_Table1.pdf [file Supp_Table1.pdf]

SUPPLEMENTARY TABLE S1. PRIMERS USED FOR QUANTITATIVE REVERSE TRANSCRIPTION PCR

| <i>Target</i> | <i>Forward primer (5'-3')</i> | <i>Reverse primer (5'-3')</i> |
|---------------|-------------------------------|-------------------------------|
| GAPDH         | CATCACCATCTTCCAGGAGCGA        | GTGGTTCACACCCATCACAAACA       |
| DES           | CAGTATGAGACCATCGCGGCTA        | GCAGGTGTAGGACTGGATCTGG        |
| MSTN          | ACAGCCTGAATCCAACCTTAGGCA      | CTCATCGCAGTCAAGCCCAAAG        |
| MYF5          | ATGTAACAGCCCTGTCTGGTCC        | GAGAGAGGGAAGCTGTGTCCTG        |
| MYF6          | TTCTTGAGGGTGCGGATTCCT         | GGGAGTTGCGTTCCTCTGAAG         |
| MYH1          | TGCAGAGCAAGATTGAGGACGA        | CCAGCTTCTTCCAGCCTCTCG         |
| MYOD          | TCCAACCTGCTCTGATGGCATGA       | CCTCACTGTAGTAGGCGGTGTC        |
| MYOG          | CAGTGAATGCAACTCCCACAGC        | CTCAGTTGGGCATGGTTTCGTC        |
| TNN1          | GGTGGATGAGGAGCGCTATGAT        | AGATCCATGGACACCTTGTGCT        |
